# Supplementary material
Source: ML conference proceedings conference paper supplement (https://proceedings.neurips.cc/paper_files/paper/2022/hash/d3b8ce5e27b1c622d1b3da22b215e59b-Abstract.html)
Supplement: Supplementary file 1 [file d3b8ce5e27b1c622d1b3da22b215e59b-Supplemental-Conference.pdf]

---

# Appendix: A Neural Pre-Condition Active Learning Algorithm to Reduce Label Complexity

---

Anonymous Author(s)  
Affiliation  
Address  
email

## 1 A Proof of Theorem 1

2 Assume a non-degenerate training set  $\|x_i - x_j\| > 0, \forall i \neq j$ . Theorem 1 in the main script is  
3 re-written:

4 **Theorem 1.** *At each gradient descent iteration  $t$  with step size  $\eta = \mathcal{O}(\lambda_{\min}(\mathcal{K}_0))$ , the MSE loss  $\mathcal{L}$*   
5 *suffered by a properly-initialized feedforward ReLU network decays as*

$$\mathcal{L}_{t+1} \leq (1 - \mathcal{O}(\eta \lambda_{\min}(\mathcal{K}_t))) \mathcal{L}_t \quad (1)$$

6 *with high probability over initialization.*

7 We adopt the convention that all gradients are flattened in vector form and use the Euclidean norms  
8 to represent their size. First we express training dynamics as a recursion:

9 **Lemma 1.** *Feedforward DNNs with once-differentiable activation functions trained using gradient*  
10 *descent on the MSE loss  $\mathcal{L}_t$  with step size  $\eta$  follows the recursion:*

$$\mathcal{L}_{t+1} \leq (1 - \eta \lambda_{\min}(\mathcal{K}_t)) \mathcal{L}_t + \xi_t + \epsilon_t, \quad (2)$$

11 *where  $\xi_t = \int_0^\eta \nabla \mathcal{L}_t^T (\nabla \mathcal{L}_t - \nabla \mathcal{L}(\theta_t - \gamma \nabla \mathcal{L}_t)) d\gamma$  and  $\epsilon_t = \frac{1}{2}(f_{\theta_{t+1}} - f_{\theta_t})^2$ .*

12 *Proof.* This derivation is mostly from Du et al. (2019), but we include the proof under our notations  
13 for completeness. Let  $e_t = y - f_{\theta_t}$ . A standard technique with triangular inequality gives

$$\mathcal{L}_{t+1} \leq \mathcal{L}_t + \|f_{\theta_{t+1}} - f_{\theta_t}\|^2 - 2e_t^T (f_{\theta_{t+1}} - f_{\theta_t}). \quad (3)$$

14 Let  $h(\eta) = f(\theta_t - \eta \nabla \mathcal{L}_t)$ . By the fundamental theorem of calculus,

$$\begin{aligned} f_{\theta_{t+1}} - f(\theta_t) &= h(\eta) - h(0) \\ &= \int_0^\eta h'(\gamma) d\gamma = \int_0^\eta h'(0) d\gamma + \int_0^\eta h'(\gamma) - h'(0) d\gamma \end{aligned}$$

15 Since  $h'(0) = -\nabla f(\theta_t)^T \nabla \mathcal{L}_t = -e \nabla f_{\theta_t}^T \nabla f_{\theta_t} = -e \text{Tr}(\mathcal{K}_t)$ , we have

$$e^T (f_{\theta_{t+1}} - f_{\theta_t}) = -\eta e^T \mathcal{K}_t e + \int_0^\eta h'(\gamma) - h'(0) d\gamma \leq -\eta \lambda_{\min}(\mathcal{K}_t) \mathcal{L}_t + \xi_t.$$

16 Substituting into Eq. 3 gives Eq. 2 together with  $e_t \int_0^\eta h'(\gamma) - h'(0) d\gamma =$   
17  $\int_0^\eta \nabla \mathcal{L}_t^T (\nabla \mathcal{L}_t - \nabla \mathcal{L}(\theta_t - \gamma \nabla \mathcal{L}_t)) d\gamma$ . □

18 The above bound sheds light on training dynamics, where the first term decreases linearly with rate  
19 determined by the Gram matrix' eigenvalue. To establish Thm. 1 that states the loss descends at each  
20 gradient step, it remains to prove that residual terms  $\xi_t, \epsilon_t$  grow (sub-)linearly with  $\mathcal{L}_t$ .

21 An extension of smoothness and convexity is defined following (Allen-Zhu et al., 2019):

**Definition 1** (Smoothness). A non-negative, once-differentiable function  $g \in C^1(\mathcal{X})$  is  $(\alpha, \beta)$ -smooth if for every  $x, y \in \mathcal{X}$ ,

$$g(y) \leq g(x) + \nabla g(x)^T (y - x) + \alpha \sqrt{g(x)} \|y - x\| + \beta \|y - x\|^2 \quad (4)$$

**Definition 2** (Near-Convexity). A non-negative function  $g \in C^1(\mathcal{X})$  has gradients  $\nabla g$  that scale as  $(\mu, M)$  if

$$\mu g(x) \leq \|\nabla g(x)\|^2 \leq M g(x), \forall x \in \mathcal{X}. \quad (5)$$

If a function's gradients scale as  $(\mu, M)$ , we say the gradient scale is bounded.

First we invoke the following lemma (Thms. 3 & 4 in Allen-Zhu et al. (2019)) to show that the MSE loss remains semi-smooth and nearly convex throughout training for wide ReLU networks:

**Lemma 2.** For sufficiently small  $\|\theta - \theta_0\|$  and  $\|\theta - \theta'\|$ , the loss remains nearly convex

$$\|\nabla \mathcal{L}(\theta)\|^2 = \Theta(\mathcal{L}(\theta))$$

and semi-smooth

$$\mathcal{L}(\theta') \leq \mathcal{L}(\theta) + \nabla \mathcal{L}(\theta)^T (\theta' - \theta) + \mathcal{O}(\mathcal{L}(\theta)^{1/2} \|\theta' - \theta\|) + \mathcal{O}(\|\theta' - \theta\|^2)$$

with high probability hiding constants depending on architecture width, depth, and dataset size.

Above we use  $\Theta(\cdot)$  as upper and lower bounds matching up to multiplicative constants.

Next we bound the residual terms in Lemma 1:

**Lemma 3.** If the loss function  $\mathcal{L}_t$  remains smooth and near-convex as defined above,

$$\epsilon_t, \xi_t \leq \mathcal{O}(\eta^2) \mathcal{L}_t$$

with high probability over initialization.

*Proof.* The following inequality will be used for  $(\alpha, \beta)$ -smooth functions.

**Proposition 1.** If  $g$  is  $(\alpha, \beta)$ -smooth,

$$(\nabla g(y) - \nabla g(x))(y - x) \leq \alpha(\sqrt{g(x)} + \sqrt{g(y)})\|y - x\| + 2\beta\|y - x\|^2 \quad (6)$$

*Proof.* Expanding the LHS in terms of  $x$  and  $y$  then summing their upper bounds gives the inequality.  $\square$

**Bound on  $\xi_t$**  Proposition 1 with  $\mathcal{L}$  at  $\theta_t$  and  $\theta_t - \gamma \nabla \mathcal{L}_t$  can be used to bound the integrand.

$$(\nabla \mathcal{L}_t - \nabla \mathcal{L}(\theta_t - \gamma \nabla \mathcal{L}_t)) \nabla \mathcal{L}_t \leq \alpha \|\nabla \mathcal{L}_t\| \left( \sqrt{\mathcal{L}_t} + \sqrt{\mathcal{L}(\theta_t - \gamma \nabla \mathcal{L}_t)} \right) + 2\gamma\beta \|\nabla \mathcal{L}_t\|^2.$$

Using the definition of smoothness

$$\mathcal{L}(\theta_t - \gamma \nabla \mathcal{L}_t) \leq \mathcal{L}_t + \gamma \left( \alpha \sqrt{\mathcal{L}_t} \|\nabla \mathcal{L}_t\| - \|\nabla \mathcal{L}_t\|^2 \right) + \beta \gamma^2 \|\nabla \mathcal{L}_t\|^2,$$

and by near-convexity,

$$\leq \left( 1 + \gamma(\alpha \sqrt{M} - \mu) + \beta \gamma^2 \right) \mathcal{L}_t. \quad (7)$$

Let  $b = (\alpha \sqrt{M} - \mu) / 2\beta$  and  $c = 1/\beta - b^2$ .

$$\sqrt{\mathcal{L}_t} + \sqrt{\mathcal{L}(\theta_t - \gamma \nabla \mathcal{L}_t)} \leq \sqrt{\mathcal{L}_t} \left( 1 + \sqrt{\beta} \left( \gamma + |b| + \sqrt{|c|} \right) \right) =: \sqrt{\mathcal{L}_t} \left( \sqrt{\beta} \gamma + c' \right)$$

by the triangle inequality. Again,  $\|\nabla \mathcal{L}_t\|^2 \leq M \mathcal{L}_t$ , and we have a bound on the integrand as

$$\begin{aligned} \alpha \|\nabla \mathcal{L}_t\| \left( \sqrt{\mathcal{L}_t} + \sqrt{\mathcal{L}(\theta_t - \gamma \nabla \mathcal{L}_t)} \right) + 2\gamma\beta \|\nabla \mathcal{L}_t\|^2 &\leq \left( \alpha \sqrt{M} \left( \sqrt{\beta} \gamma + c' \right) + 2\gamma\beta M \right) \mathcal{L}_t \\ &=: (a' \gamma + c'') \mathcal{L}_t \end{aligned}$$

$$\Rightarrow \xi_t \leq \mathcal{L}_t \int_0^\eta a' \gamma + c'' d\gamma = \mathcal{O}(\eta^2) \mathcal{L}_t.$$

where we hide constants that depend on the architecture and dataset size.

**Bound on  $\epsilon_t$**  It is sufficient that  $\epsilon_t \leq (a\eta^2 + \lambda_{\min}\eta) \mathcal{L}_t$  for any  $a$  so that  $\mathcal{L}_t$  is guaranteed to decrease for small  $\eta$ . This proof is quite involved and relies on analytic expressions for ReLU networks. To this end, we follow the setting in Allen-Zhu et al. (2019) and WLOG fix the last layer’s weights as  $B$ , denoting pre- and post- activations by  $g^l, h^l$  respectively and an ‘active-indicator’ matrix  $D^l \in \mathbb{R}^{d \times d}$ ,  $D_{k,k}^l = \mathbf{1} \{g_{k,k}^l \geq 0\}$ , and weight matrices  $W_l \in \mathbb{R}^{d \times d}$  for each layer  $l \in [L]$ , where  $d$  denotes the width of the hidden layers and  $L$  is the number of layers.

Notice that for ReLU networks, we can write the post-activations at every layer as  $h_{t+1}^l - h_t^l = D_{t+1}^l W_{t+1} h_{t+1}^{l-1} - D_t^l W_t h_t^{l-1}$ .

**Proposition 2** (Distributive diagonal matrices). *There exists  $\tilde{D} = (\tilde{D}^1, \dots, \tilde{D}^L)$  with  $\tilde{D}^l \in [-1, 1]^{d \times d}$  for every  $l$  such that*

$$D_{t+1}^l W_{t+1}^l h_{t+1}^l - D_t^l W_t^l h_t^l = (D_t^l + \tilde{D}^l) (W_{t+1}^l h_{t+1}^{l-1} - W_t^l h_t^{l-1}).$$

The above proposition follows from case-by-case considerations of ReLU activations, see Proposition 11.3 in Allen-Zhu et al. (2019).

**Proposition 3** (Linear expansion of post-activations). *There exists some  $\tilde{D}^l \in [-1, 1]^{d \times d}$  at each  $l$  such that*

$$h_{t+1}^l - h_t^l = -\eta \sum_{r=1}^l (D_t^l + \tilde{D}^l) W_t^l \dots W_t^{r+1} (D_t^r + \tilde{D}^r) \times (\nabla_{W_t^r} \mathcal{L}_t) h_{t+1}^{r-1}$$

The following proposition due to Allen-Zhu et al. (2019) (Lemma 8.6b and Lemma 7.1, respectively) gives bounds on the first line on the RHS and last term:

**Proposition 4.** *For every  $l \in [L]$  and  $r \in [l]$ ,*

$$\|(D_t^l + \tilde{D}^l) W_t^l \dots W_t^{r+1} (D_t^r + \tilde{D}^r)\| \leq O(\sqrt{L}) \|h_{t+1}^{r-1}\| \leq o(1).$$

Applying Cauchy-Schwartz inequality and the fact that norm of sums  $\leq$  sum of norms to Propositions 2 and 3,

$$\|f_{\theta_{t+1}} - f_{\theta_t}\| = \|B(h_{t+1}^L - h_t^L)\|, \leq \eta O(L^{1.5} \sqrt{d}) \|\nabla \mathcal{L}_t\|.$$

Since  $\|\nabla \mathcal{L}_t\| \leq \sqrt{M \mathcal{L}_t}$ ,

$$\epsilon_t = \|f_{\theta_{t+1}} - f_{\theta_t}\|^2 \leq O(L^3 d M) \eta^2 \mathcal{L}_t = O(\eta^2) \mathcal{L}_t. \quad (8)$$

□

Theorem 1 is a direct consequence of Lemmas 1 and 3, and the step-size can be selected based on  $\mathcal{K}_0$  because  $\mathcal{K}_t$  remains in a neighborhood of  $\mathcal{K}_0$  throughout training (Arora et al., 2019).

## References

- Allen-Zhu, Z., Li, Y., and Song, Z. A convergence theory for deep learning via over-parameterization. *arXiv preprint arXiv:1811.03962*, 2019.
- Arora, S., Du, S. S., Hu, W., Li, Z., Salakhutdinov, R., and Wang, R. On exact computation with an infinitely wide neural net. *CoRR*, abs/1904.11955, 2019.
- Du, S., Lee, J., Li, H., Wang, L., and Zhai, X. Gradient descent finds global minima of deep neural networks. volume 97 of *Proceedings of Machine Learning Research*, pp. 1675–1685, Long Beach, California, USA, 09–15 Jun 2019. PMLR.
